# Supplementary material for: Functional regulatory mechanism of smooth muscle cell-restricted LMOD1 coronary artery disease locus
Source: PubMed Central journal article supplement (PMC6268002; doi:10.1371/journal.pgen.1007755), 2018-11-16

**A** Fasting Glucose - MAGIC 2012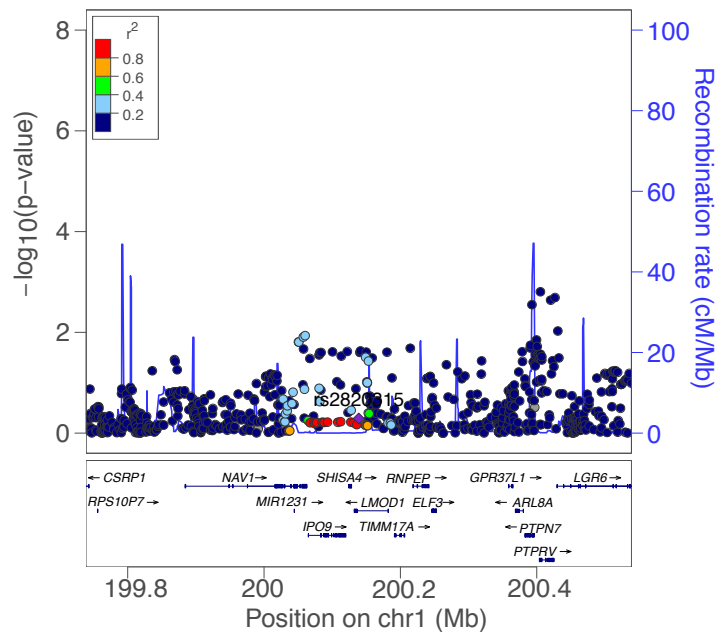**B** Fasting Insulin - MAGIC 2012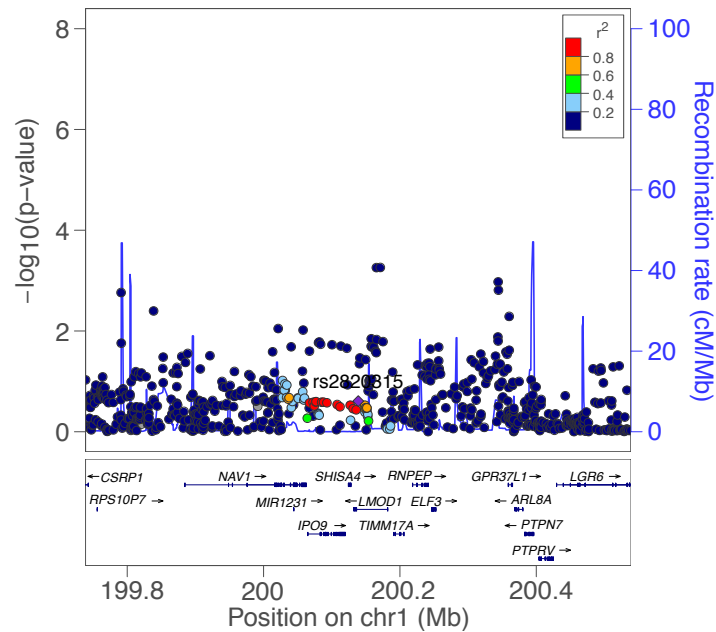**C** Systolic Blood Pressure - ICBP 2011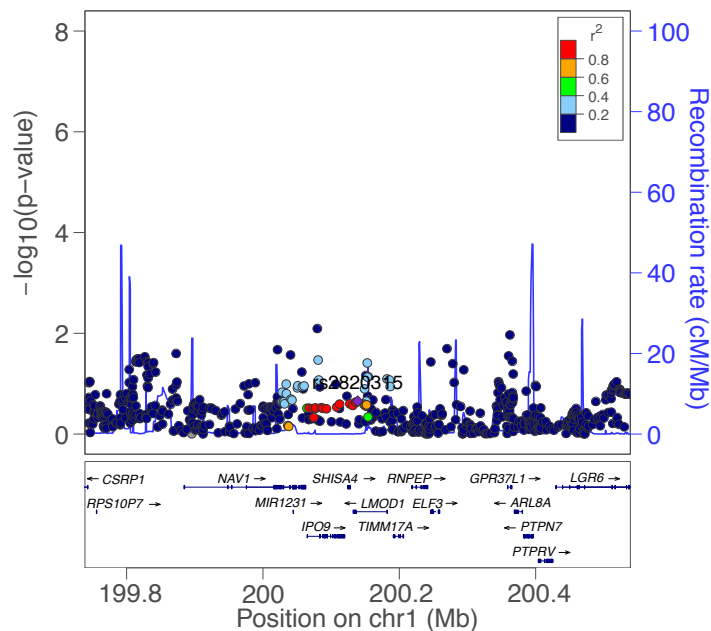**D** Low vWF - CHARGE 2014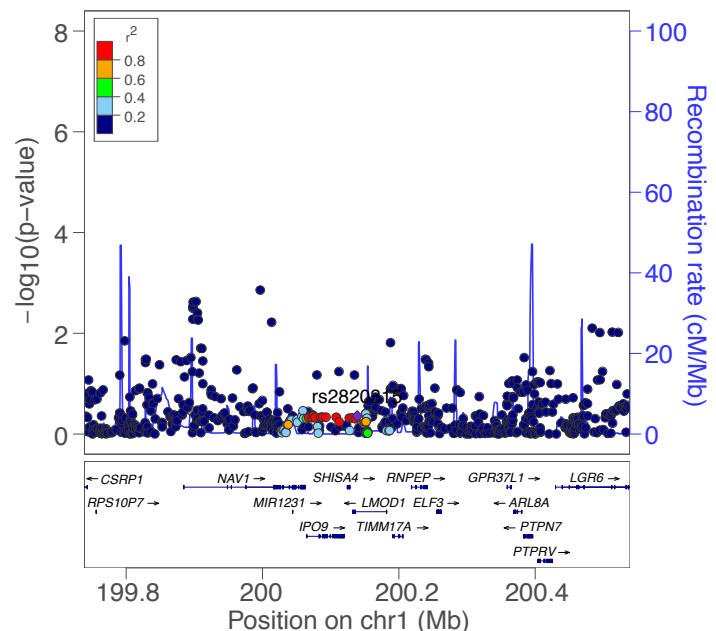

Supplement: pgen.1007755.s001.pdf [file pgen.1007755.s001.pdf]
