# Supplementary material for: Functional regulatory mechanism of smooth muscle cell-restricted LMOD1 coronary artery disease locus
Source: PubMed Central journal article supplement (PMC6268002; doi:10.1371/journal.pgen.1007755), 2018-11-16
Supplement: pgen.1007755.s007.pdf [file pgen.1007755.s007.pdf]

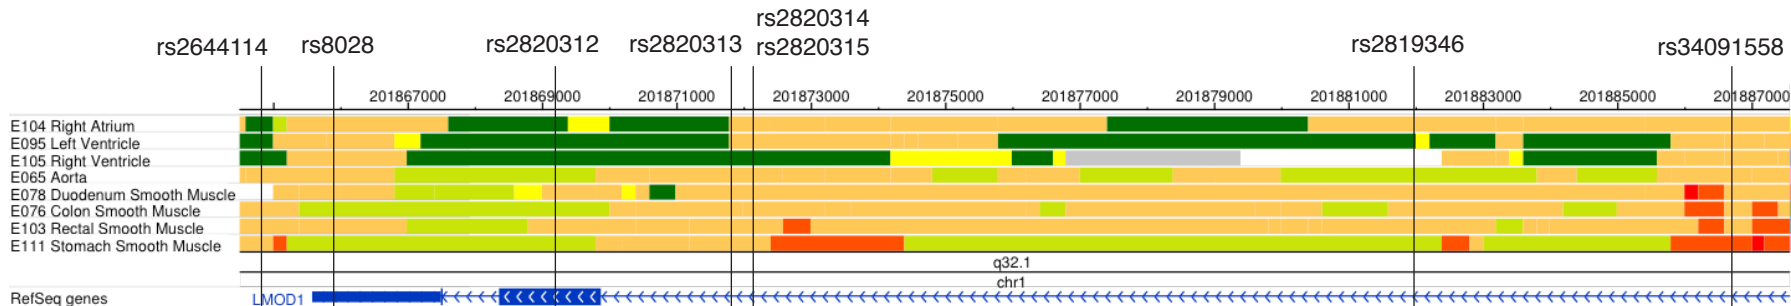

|                              |          |
|------------------------------|----------|
| 1 Active TSS                 | TssA     |
| 2 Flanking active TSS        | TssAFlnk |
| 3 Transcr. at gene 5' and 3' | TxFlnk   |
| 4 Strong transcription       | Tx       |
| 5 Weak transcription         | TxWk     |
| 6 Genic enhancers            | EnhG     |
| 7 Enhancers                  | Enh      |
| 8 ZNF genes + repeats        | ZNF/Rpts |
| 9 Heterochromatin            | Het      |
| 10 Bivalent/poised TSS       | TssBiv   |
| 11 Flanking bivalent TSS/Enh | BivFlnk  |
| 12 Bivalent enhancer         | EnhBiv   |
| 13 Repressed Polycomb        | ReprPC   |
| 14 Weak repressed Polycomb   | ReprPCWk |
| 15 Quiescent/low             | Quies    |
