# Supplementary material for: Functional regulatory mechanism of smooth muscle cell-restricted LMOD1 coronary artery disease locus
Source: PubMed Central journal article supplement (PMC6268002; doi:10.1371/journal.pgen.1007755), 2018-11-16

# Conditional analysis on rs34091558 in CARDIoGRAMplus C4D + UK Biobank

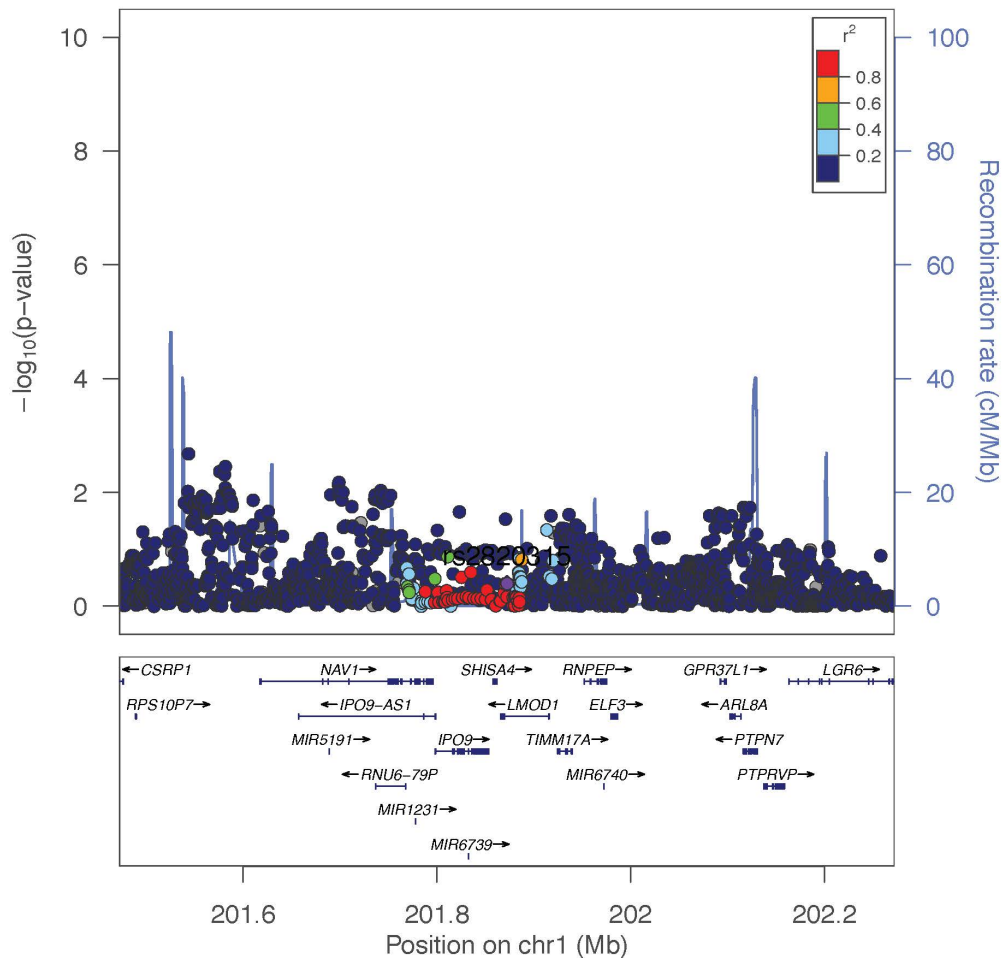

Supplement: pgen.1007755.s008.pdf [file pgen.1007755.s008.pdf]
