# Supplementary material for: Functional regulatory mechanism of smooth muscle cell-restricted LMOD1 coronary artery disease locus
Source: PubMed Central journal article supplement (PMC6268002; doi:10.1371/journal.pgen.1007755), 2018-11-16

**A**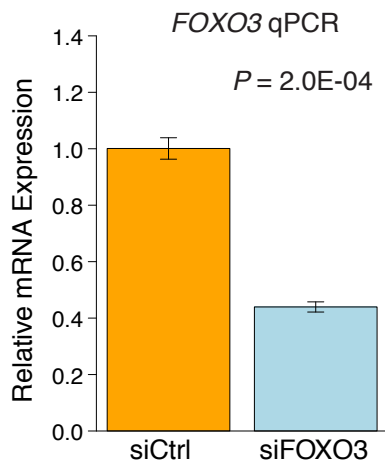**B**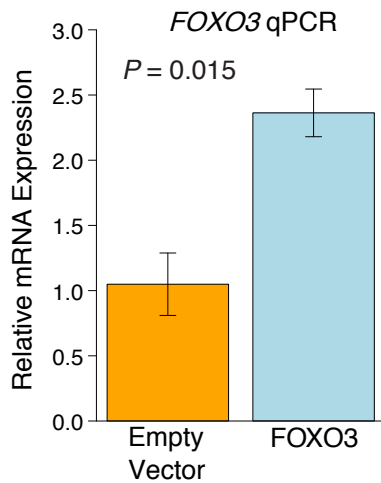**C**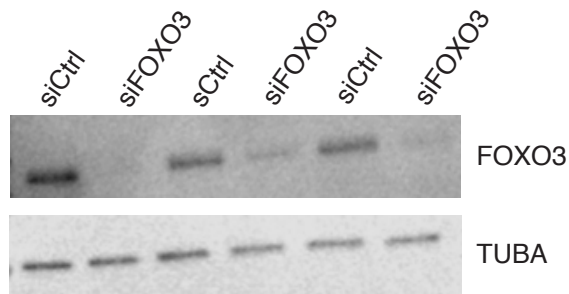

Supplement: pgen.1007755.s010.pdf [file pgen.1007755.s010.pdf]
