# Supplementary material for: Functional regulatory mechanism of smooth muscle cell-restricted LMOD1 coronary artery disease locus
Source: PubMed Central journal article supplement (PMC6268002; doi:10.1371/journal.pgen.1007755), 2018-11-16
Supplement: pgen.1007755.s013.pdf [file pgen.1007755.s013.pdf]

**S1 Table. eQTL associations for rs34091558 and rs2820315 in GTEx artery tissues.**

| GTEx Tissue     | Ensembl ID      | Gene Symbol     | eSNP       | Nominal P-value | Effect size (beta) |
|-----------------|-----------------|-----------------|------------|-----------------|--------------------|
| Tibial Artery   | ENSG00000163431 | <i>LMOD1</i>    | rs34091558 | <b>4.99E-09</b> | -0.1133            |
| Tibial Artery   | ENSG00000198892 | <i>SHISA4</i>   | rs34091558 | 0.1622          | -0.0357            |
| Tibial Artery   | ENSG00000198700 | <i>IPO9</i>     | rs34091558 | 0.0104          | 0.0778             |
| Tibial Artery   | ENSG00000231871 | <i>IPO9-AS1</i> | rs34091558 | 0.9056          | -0.0096            |
| Tibial Artery   | ENSG00000134369 | <i>NAV1</i>     | rs34091558 | 0.1043          | 0.0518             |
| Tibial Artery   | ENSG00000163431 | <i>LMOD1</i>    | rs2820315  | <b>1.24E-07</b> | -0.1055            |
| Tibial Artery   | ENSG00000198892 | <i>SHISA4</i>   | rs2820315  | 0.0588          | -0.0495            |
| Tibial Artery   | ENSG00000198700 | <i>IPO9</i>     | rs2820315  | 0.0364          | 0.0654             |
| Tibial Artery   | ENSG00000231871 | <i>IPO9-AS1</i> | rs2820315  | 0.9378          | -0.0065            |
| Tibial Artery   | ENSG00000134369 | <i>NAV1</i>     | rs2820315  | 0.1482          | 0.0474             |
| Coronary Artery | ENSG00000163431 | <i>LMOD1</i>    | rs34091558 | 0.0157          | -0.0914            |
| Coronary Artery | ENSG00000198892 | <i>SHISA4</i>   | rs34091558 | 0.6137          | 0.0266             |
| Coronary Artery | ENSG00000198700 | <i>IPO9</i>     | rs34091558 | 0.1969          | 0.0596             |
| Coronary Artery | ENSG00000231871 | <i>IPO9-AS1</i> | rs34091558 | 0.221           | 0.1444             |
| Coronary Artery | ENSG00000134369 | <i>NAV1</i>     | rs34091558 | 0.2022          | 0.1186             |
| Coronary Artery | ENSG00000163431 | <i>LMOD1</i>    | rs2820315  | 0.0132          | -0.0971            |
| Coronary Artery | ENSG00000198892 | <i>SHISA4</i>   | rs2820315  | 0.8806          | 0.0082             |
| Coronary Artery | ENSG00000198700 | <i>IPO9</i>     | rs2820315  | 0.1256          | 0.0732             |
| Coronary Artery | ENSG00000231871 | <i>IPO9-AS1</i> | rs2820315  | 0.186           | 0.1615             |
| Coronary Artery | ENSG00000134369 | <i>NAV1</i>     | rs2820315  | 0.0723          | 0.1725             |
| Aorta Artery    | ENSG00000163431 | <i>LMOD1</i>    | rs34091558 | 0.0157          | -0.0914            |
| Aorta Artery    | ENSG00000198892 | <i>SHISA4</i>   | rs34091558 | 0.953           | -0.0021            |
| Aorta Artery    | ENSG00000198700 | <i>IPO9</i>     | rs34091558 | 0.0003          | 0.1191             |
| Aorta Artery    | ENSG00000231871 | <i>IPO9-AS1</i> | rs34091558 | 0.0443          | 0.1321             |
| Aorta Artery    | ENSG00000134369 | <i>NAV1</i>     | rs34091558 | 0.1883          | 0.0537             |
| Aorta Artery    | ENSG00000163431 | <i>LMOD1</i>    | rs2820315  | 0.0011          | -0.1088            |
| Aorta Artery    | ENSG00000198892 | <i>SHISA4</i>   | rs2820315  | 0.6838          | 0.016              |
| Aorta Artery    | ENSG00000198700 | <i>IPO9</i>     | rs2820315  | 0.0001          | 0.1351             |
| Aorta Artery    | ENSG00000231871 | <i>IPO9-AS1</i> | rs2820315  | 0.0399          | 0.1425             |
| Aorta Artery    | ENSG00000134369 | <i>NAV1</i>     | rs2820315  | 0.1049          | 0.0698             |
