# Supplementary material for: Functional regulatory mechanism of smooth muscle cell-restricted LMOD1 coronary artery disease locus
Source: PubMed Central journal article supplement (PMC6268002; doi:10.1371/journal.pgen.1007755), 2018-11-16
Supplement: pgen.1007755.s014.pdf [file pgen.1007755.s014.pdf]

**S2 Table. PICS fine-mapping results of *LMOD1* CAD locus.**

| Index SNP | Linked SNP  | Dprime | R-Square | Phase | PICS_probability |
|-----------|-------------|--------|----------|-------|------------------|
| rs2820315 | rs2820315   | 1      | 1        | N,N   | 0.1579           |
| rs2820315 | rs34091558  | 0.9937 | 0.9399   | C,R   | 0.0419           |
| rs2820315 | rs2820314   | 1      | 0.929    | C,A   | 0.0368           |
| rs2820315 | rs2820323   | 1      | 0.896    | C,G   | 0.0253           |
| rs2820315 | rs2820321   | 1      | 0.896    | C,G   | 0.0253           |
| rs2820315 | rs2820319   | 1      | 0.896    | C,G   | 0.0253           |
| rs2820315 | rs2819351   | 1      | 0.896    | C,C   | 0.0253           |
| rs2820315 | rs2819349   | 1      | 0.896    | C,C   | 0.0253           |
| rs2820315 | rs2819347   | 1      | 0.896    | C,C   | 0.0253           |
| rs2820315 | rs2820322   | 1      | 0.8907   | C,T   | 0.0239           |
| rs2820315 | rs2820318   | 1      | 0.8907   | C,T   | 0.0239           |
| rs2820315 | rs2820317   | 1      | 0.8907   | C,G   | 0.0239           |
| rs2820315 | rs2819348   | 1      | 0.8907   | C,T   | 0.0239           |
| rs2820315 | rs2819346   | 1      | 0.8907   | C,A   | 0.0239           |
| rs2820315 | rs2644121   | 1      | 0.8854   | C,A   | 0.0226           |
| rs2820315 | rs201603952 | 1      | 0.8495   | C,R   | 0.0155           |
| rs2820315 | rs5780094   | 0.9191 | 0.8447   | C,R   | 0.0147           |
| rs2820315 | rs72310529  | 1      | 0.8445   | C,R   | 0.0147           |
| rs2820315 | rs2820310   | 0.9429 | 0.836    | C,G   | 0.0135           |
| rs2820315 | rs2494115   | 0.9429 | 0.836    | C,G   | 0.0135           |
| rs2820315 | rs2254614   | 0.9429 | 0.836    | C,T   | 0.0135           |
| rs2820315 | rs2644134   | 0.9247 | 0.8342   | C,G   | 0.0132           |
| rs2820315 | rs8028      | 0.9428 | 0.8307   | C,G   | 0.0127           |
| rs2820315 | rs2820312   | 0.9428 | 0.8307   | C,G   | 0.0127           |
| rs2820315 | rs2820311   | 0.9428 | 0.8307   | C,A   | 0.0127           |
