# Supplementary material for: Functional regulatory mechanism of smooth muscle cell-restricted LMOD1 coronary artery disease locus
Source: PubMed Central journal article supplement (PMC6268002; doi:10.1371/journal.pgen.1007755), 2018-11-16
Supplement: pgen.1007755.s015.pdf [file pgen.1007755.s015.pdf]

**S3 Table. PAINTOR fine-mapping results of *LMOD1* CAD locus using HCASMC annotations.**

| chr  | pos       | rsid        | ref | alt | Zscore    | Posterior_Prob |
|------|-----------|-------------|-----|-----|-----------|----------------|
| chr1 | 201886769 | rs34091558  | TA  | T   | -4.23147  | 1              |
| chr1 | 201500825 | rs4915537   | T   | C   | -1.21108  | 0.991236       |
| chr1 | 201885157 | rs2819351   | T   | C   | 3.93095   | 0.991236       |
| chr1 | 201907945 | rs7533340   | C   | T   | -1.01796  | 0.991236       |
| chr1 | 201805926 | rs16849383  | C   | T   | -0.991702 | 0.00876378     |
| chr1 | 201884952 | rs2819348   | C   | T   | 3.80651   | 0.00876378     |
| chr1 | 201872264 | rs2820315   | T   | C   | 4.52362   | 2.18E-19       |
| chr1 | 201883160 | rs2820323   | A   | G   | 3.74832   | 2.18E-19       |
| chr1 | 201882087 | rs2819346   | C   | A   | 3.64641   | 2.63E-23       |
| chr1 | 201802052 | rs2644111   | A   | G   | 3.85847   | 3.09E-27       |
| chr1 | 201880300 | rs2820322   | C   | T   | 3.62866   | 3.09E-27       |
| chr1 | 201851492 | rs2644134   | A   | G   | -4.29502  | 3.05E-28       |
| chr1 | 201872209 | rs2820314   | C   | A   | 4.02326   | 1.72E-28       |
| chr1 | 201881284 | rs2644121   | G   | A   | 3.63377   | 1.72E-28       |
| chr1 | 201885026 | rs2819349   | T   | C   | 3.91618   | 1.72E-28       |
| chr1 | 202067723 | rs4245702   | G   | A   | -1.16991  | 1.72E-28       |
| chr1 | 201787940 | rs2678210   | C   | T   | 4.35153   | 1.25E-33       |
| chr1 | 201821707 | rs74430074  | G   | A   | -1.00873  | 1.25E-33       |
| chr1 | 201825750 | rs10800793  | G   | A   | -1.71147  | 1.25E-33       |
| chr1 | 202053119 | rs143250450 | A   | G   | 1.62979   | 6.76E-35       |
| chr1 | 201520113 | rs116349281 | T   | C   | 1.3849    | 3.03E-38       |
| chr1 | 201712172 | rs12089993  | T   | C   | -2.09661  | 3.03E-38       |
| chr1 | 201825277 | rs56923474  | T   | C   | 4.0542    | 3.03E-38       |
| chr1 | 201654790 | rs1414972   | T   | C   | -1.32103  | 8.23E-42       |
| chr1 | 201956217 | rs6690438   | T   | C   | -0.861696 | 8.23E-42       |
