# Supplementary material for: Functional regulatory mechanism of smooth muscle cell-restricted LMOD1 coronary artery disease locus
Source: PubMed Central journal article supplement (PMC6268002; doi:10.1371/journal.pgen.1007755), 2018-11-16
Supplement: pgen.1007755.s016.pdf [file pgen.1007755.s016.pdf]

**S4 Table. FINEMAP fine-mapping results using GTEx eQTL and CAD summary results.**

| index | snp       | rsid       | snp_prob | snp_log10bf |
|-------|-----------|------------|----------|-------------|
| 812   | 201886769 | rs34091558 | 0.9274   | 4.174       |
| 801   | 201884952 | rs2819348  | 0.0396   | 1.6825      |
| 789   | 201881284 | rs2644121  | 0.0047   | 0.7451      |
| 788   | 201880300 | rs2820322  | 0.0047   | 0.7451      |
| 783   | 201878620 | rs2820318  | 0.0047   | 0.7451      |
| 782   | 201878537 | rs2820317  | 0.0047   | 0.7451      |
| 787   | 201880296 | rs2820321  | 0.0042   | 0.6925      |
| 784   | 201878650 | rs2820319  | 0.0042   | 0.6925      |
| 796   | 201884288 | rs2819347  | 0.0027   | 0.4988      |
| 803   | 201885157 | rs2819351  | 0.0008   | -0.0486     |
| 790   | 201882087 | rs2819346  | 0.0007   | -0.0582     |
| 802   | 201885026 | rs2819349  | 0.0006   | -0.1726     |
| 773   | 201872264 | rs2820315  | 0.0002   | -0.6499     |
| 768   | 201869257 | rs2820312  | 0.0001   | -0.8948     |
| 769   | 201870221 | rs2820313  | 0.0001   | -1.0002     |
| 765   | 201865763 | rs8028     | 0.0001   | -1.0501     |
| 717   | 201830247 | rs2254614  | 0        | -1.3467     |
| 671   | 201800511 | rs2678204  | 0        | -1.3476     |
| 745   | 201850057 | rs1517810  | 0        | -1.3777     |
| 710   | 201826482 | rs2132363  | 0        | -1.3777     |
| 702   | 201821443 | rs1400875  | 0        | -1.4242     |
| 772   | 201872209 | rs2820314  | 0        | -1.4242     |
| 687   | 201809918 | rs903678   | 0        | -1.4945     |
| 758   | 201860626 | rs2250377  | 0        | -1.4981     |
| 720   | 201832864 | rs2494115  | 0        | -1.5285     |
