# Supplementary material for: Functional regulatory mechanism of smooth muscle cell-restricted LMOD1 coronary artery disease locus
Source: PubMed Central journal article supplement (PMC6268002; doi:10.1371/journal.pgen.1007755), 2018-11-16
Supplement: pgen.1007755.s017.pdf [file pgen.1007755.s017.pdf]

**S5 Table. HaploReg and HCASMC functional annotations of *LMOD1* candidate regulatory variants.**

| Chr | Pos (hg19) | SNP        | ref | alt | AFR freq | AMR freq | ASN freq | EUR freq | GERP cons | SIPhy cons | Gene Annotation | HCASMC annotations              | TF motifs altered                    |
|-----|------------|------------|-----|-----|----------|----------|----------|----------|-----------|------------|-----------------|---------------------------------|--------------------------------------|
| 1   | 201864830  | rs2644114  | A   | G   | 0.75     | 0.75     | 0.89     | 0.68     | No        | No         | None            | -                               | CCNT2, GATA, HDA C2, HMGN3, TAL1     |
| 1   | 201865763  | rs8028     | A   | G   | 0.74     | 0.75     | 0.89     | 0.68     | No        | No         | 3'-UTR          | H3K4me1, H3K4me3, H3K27ac       | PBX3, HIC1                           |
| 1   | 201869257  | rs2820312  | G   | A   | 0.27     | 0.25     | 0.11     | 0.32     | No        | No         | missense        | -                               | TAL1                                 |
| 1   | 201870221  | rs2820313  | A   | G   | 0.4      | 0.26     | 0.11     | 0.32     | No        | No         | intronic        | -                               | BDP1                                 |
| 1   | 201872209  | rs2820314  | A   | C   | 0.28     | 0.25     | 0.11     | 0.32     | No        | No         | intronic        | H3K4me1, H3K27ac, ATAC          | EWSR1-FLI1, IRF, STAT                |
| 1   | 201872264  | rs2820315  | A   | C   | 0.08     | 0.23     | 0.11     | 0.3      | No        | No         | intronic        | H3K4me1, H3K27ac, ATAC          | -                                    |
| 1   | 201882087  | rs2819346  | A   | C   | 0.41     | 0.26     | 0.11     | 0.33     | No        | No         | intronic        | H3K4me1                         | -                                    |
| 1   | 201882087  | rs34091558 | TA  | T   | 0.16     | 0.24     | 0.12     | 0.32     | Yes       | Yes        | intronic        | H3K4me1, H3K4me3, H3K27ac, ATAC | FOXO1, FOXO2, FOXO3, FOXF2, GATA, GR |
