# Supplementary material for: Functional regulatory mechanism of smooth muscle cell-restricted LMOD1 coronary artery disease locus
Source: PubMed Central journal article supplement (PMC6268002; doi:10.1371/journal.pgen.1007755), 2018-11-16
Supplement: pgen.1007755.s018.pdf [file pgen.1007755.s018.pdf]

**S6 Table. Effects of rs34091558 SNP on TFBS predictions – JASPAR.**

| TF    | Relative score with non-risk allele(TA) | Relative score with risk allele (T) | Start | End | Strand | Predicted site sequence |
|-------|-----------------------------------------|-------------------------------------|-------|-----|--------|-------------------------|
| FOXO3 | 0.912811839                             | 0.6712661997                        | 24    | 31  | 1      | ATaAACA                 |
| Foxj2 | 0.995583773                             | 0.599554113                         | 24    | 31  | 1      | ATaAACA                 |
| FOXL1 | 0.993644848                             | 0.70792828                          | 24    | 30  | 1      | ATaACA                  |
| FOXG1 | 0.986271908                             | 0.601294322                         | 24    | 31  | 1      | ATaAACA                 |
| FOXP3 | 0.978500686                             | 0.651449584                         | 24    | 30  | 1      | ATaACA                  |
| FOXD2 | 0.9778315                               | 0.658205573                         | 24    | 30  | 1      | ATaACA                  |
| FOXO4 | 0.966856102                             | 0.699013536                         | 24    | 30  | 1      | ATaACA                  |
| FOXO6 | 0.961235393                             | 0.666238404                         | 24    | 30  | 1      | ATaACA                  |
| GATA3 | 0.947950121                             | 0.880039471                         | 22    | 29  | 1      | AGATaAAC                |
| FOXI1 | 0.942137921                             | 0.681867373                         | 24    | 30  | 1      | ATaACA                  |
| GATA5 | 0.937937861                             | 0.835939939                         | 22    | 29  | 1      | AGATaAAC                |
| FOXP2 | 0.932396163                             | 0.550531421                         | 22    | 32  | 1      | AGATaACAAG              |
| Gata4 | 0.932341169                             | 0.960161265                         | 19    | 29  | -1     | GTTtATCTCCC             |
| Gata1 | 0.931110197                             | 0.917970273                         | 20    | 30  | -1     | TGTTtATCTCC             |
| Foxo1 | 0.921336839                             | 0.814379019                         | 23    | 33  | -1     | ACTTGTTtATC             |
| GATA2 | 0.90370878                              | 0.930485573                         | 20    | 33  | -1     | ACTTGTTtATCTCC          |
