# Supplementary material for: Functional regulatory mechanism of smooth muscle cell-restricted LMOD1 coronary artery disease locus
Source: PubMed Central journal article supplement (PMC6268002; doi:10.1371/journal.pgen.1007755), 2018-11-16
Supplement: pgen.1007755.s019.pdf [file pgen.1007755.s019.pdf]

**S7 Table. Primer/TaqMan Assay IDs.**

| <b>Gene</b>                       | <b>Primer Sequence/TaqMan Probe Assay ID</b> |
|-----------------------------------|----------------------------------------------|
| 5'-biotinylated forward rs2820312 | GGGTCATTGTTCTTCACTCTCTCC                     |
| 5'-biotinylated reverse rs2820312 | AGACCAAAACACCCGAGAAAC                        |
| Reverse pyrosequencing primer     | CACCCGAGAAACAGA                              |
| LMOD1                             | Hs00201704_m1                                |
| FOXO3                             | Hs00921424_m1                                |
| TGFB1                             | Hs00998133_m1                                |
| Lmod1                             | Rn01483340_m1                                |
| Fwd-h-Foxo3_v1                    | GATAC GATATC GCAGAGGCACCGGCTTCCCCGGCCCCG     |
| Rev-h-Foxo3_v1                    | GATAC AAGCTT TCAGCCTGGCACCCAGCTCTGAGATGAGG   |
| Fwd-LMOD1-ChIP                    | AGTACTAGCCAGGCACTTCA                         |
| Rev-LMOD1-ChIP                    | GGAGAAACCGGAAATCTCTTT                        |
| Fwd-EGFR-ChIP                     | TCTGTGGCTGACTCCATCTG                         |
| Rev-EGFR-ChIP                     | CCCGTGACTCACTCCTTGAT                         |
